# Supplementary figures and images for: Archaea Microbiome Dysregulated Genes and Pathways as Molecular Targets for Lung Adenocarcinoma and Squamous Cell Carcinoma
Source: MDPI journal article supplement (doi:10.3390/ijms231911566), 2022-09-30

LUAD

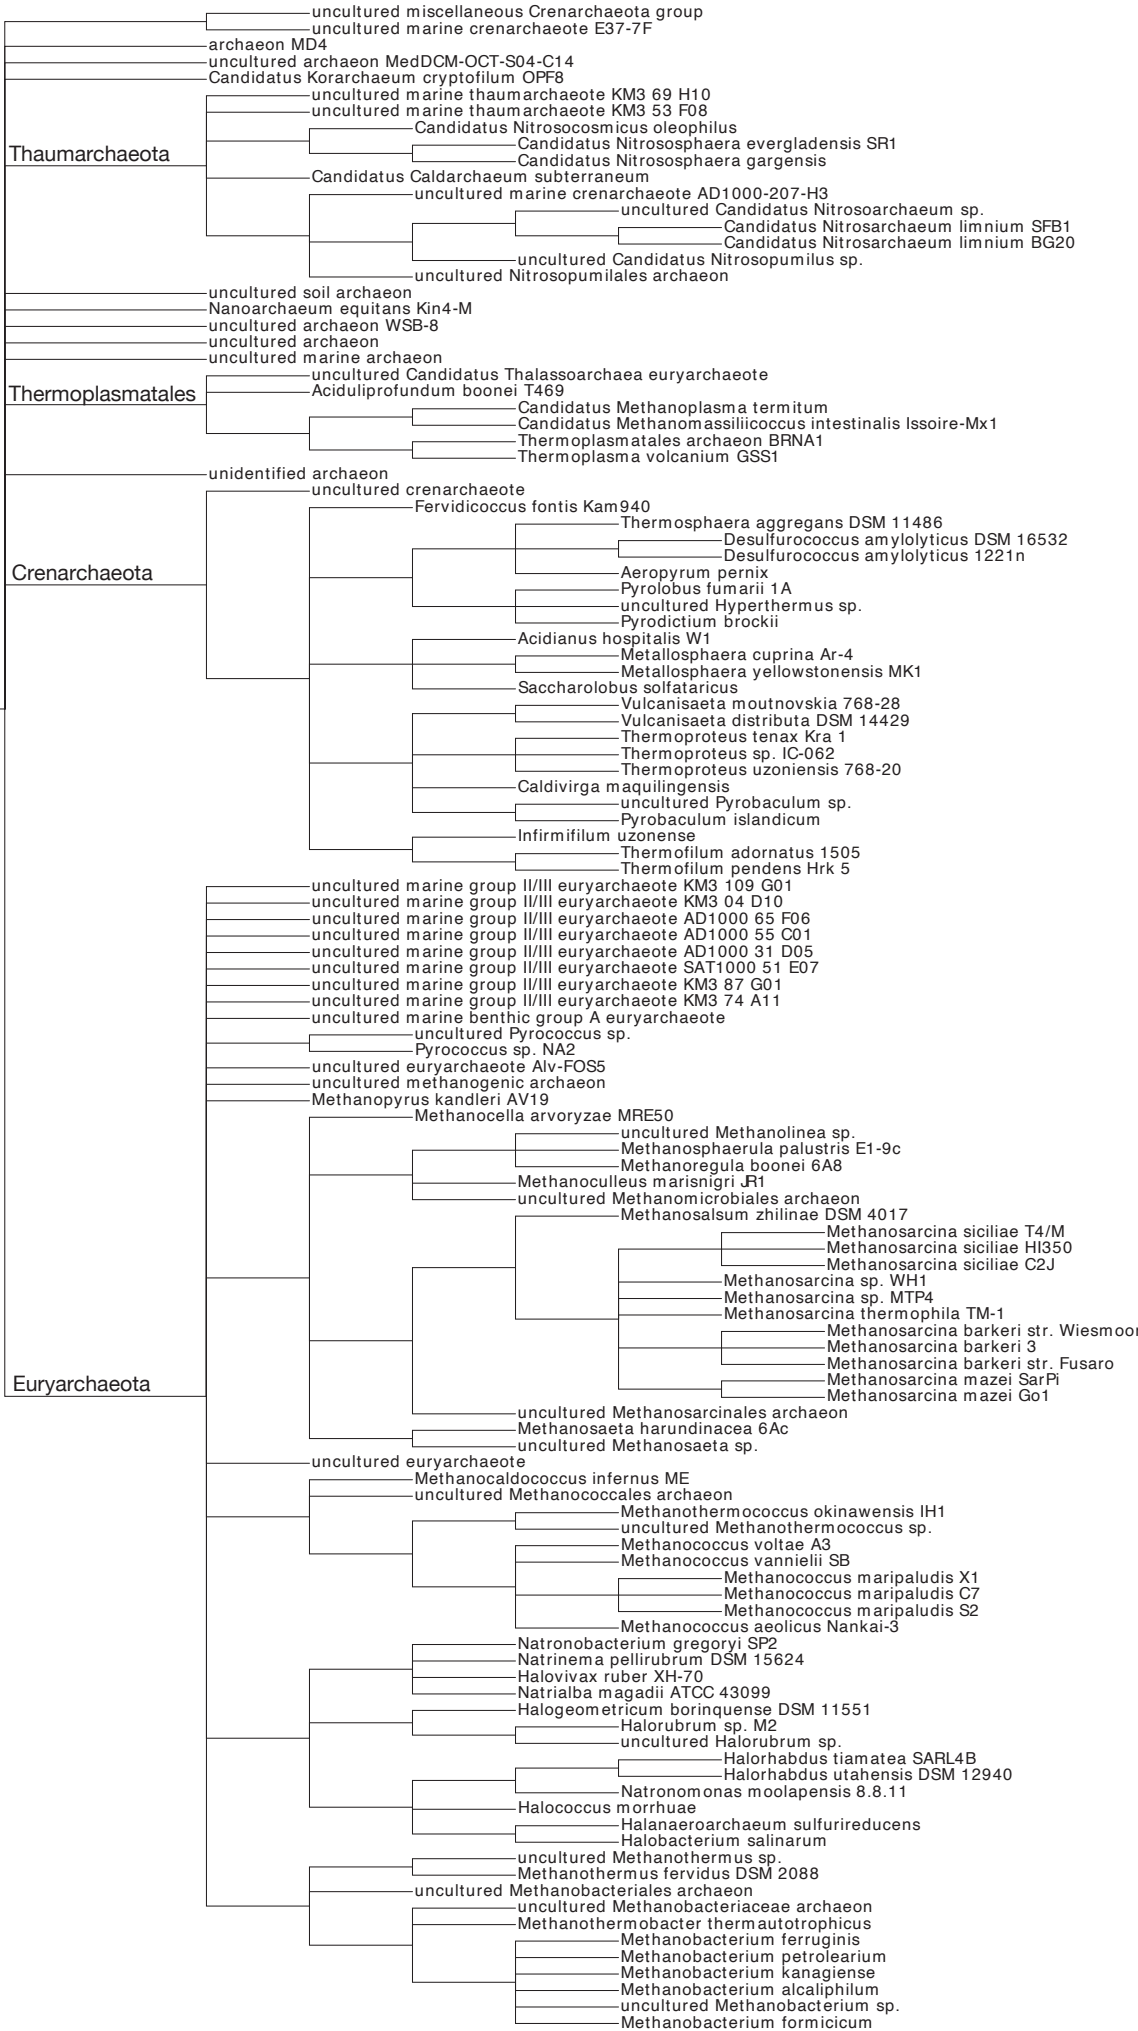

LUSC

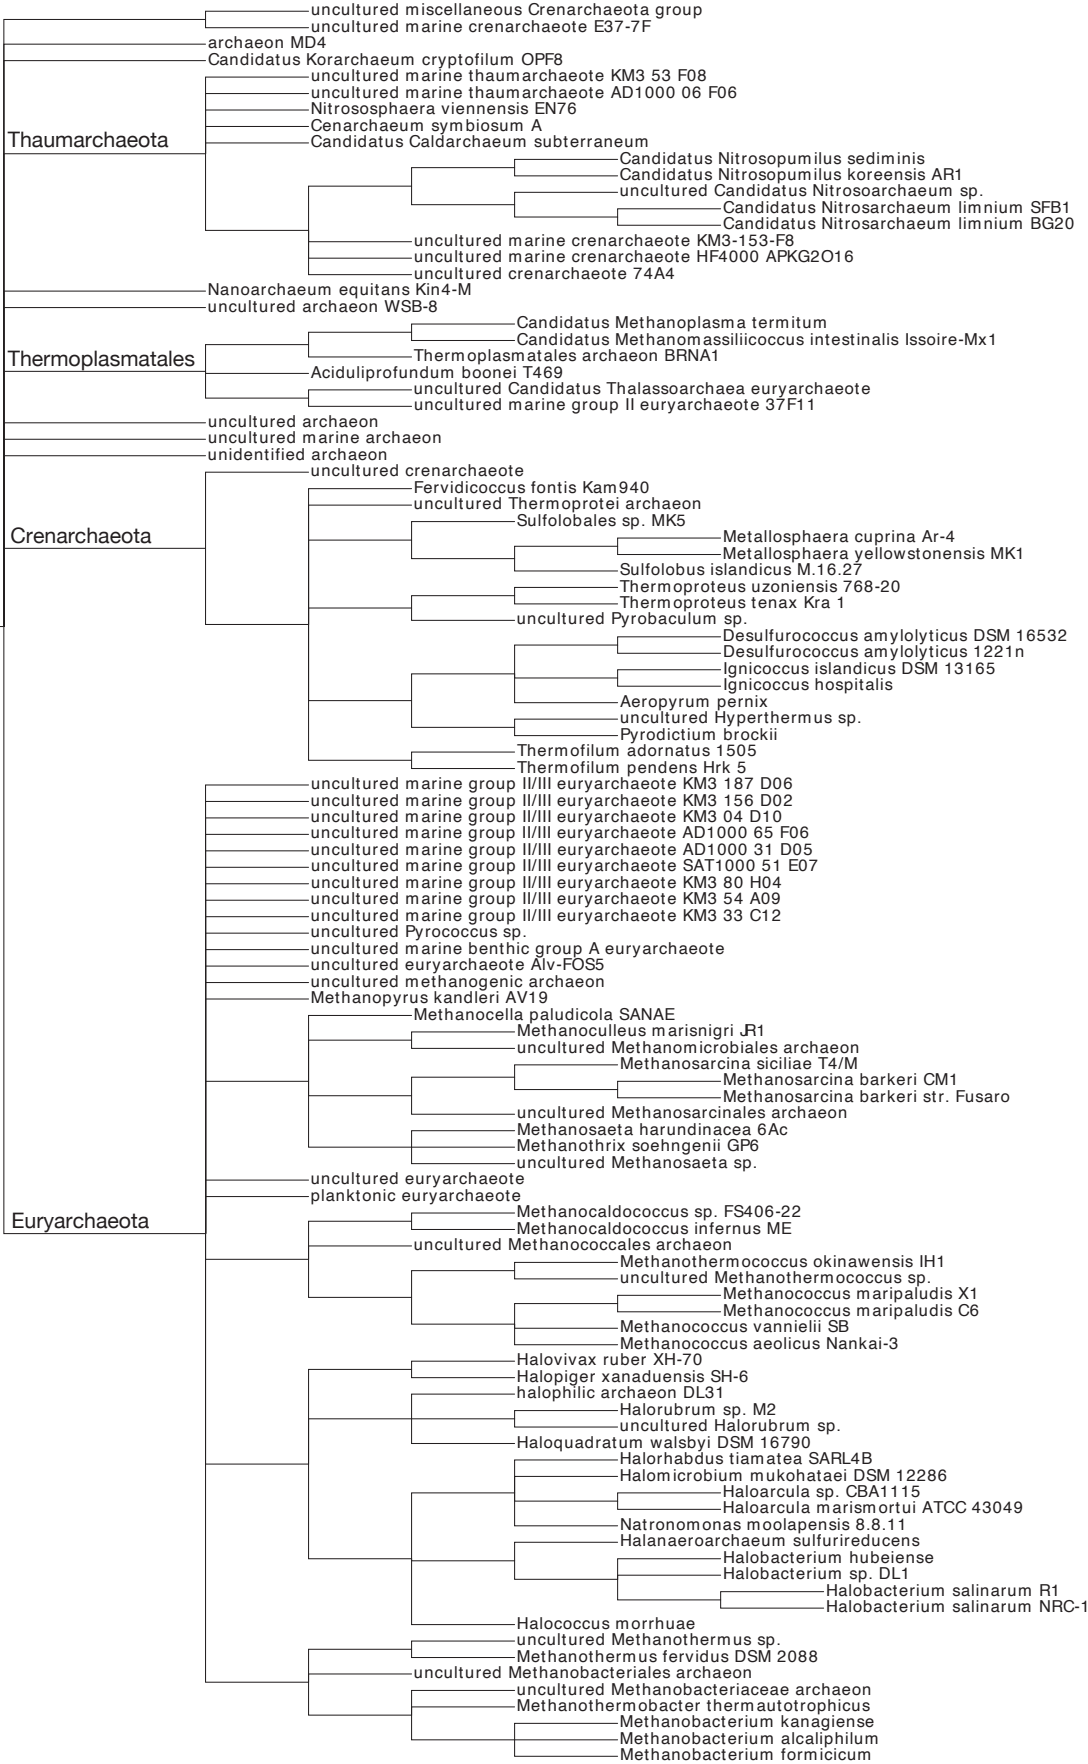

Supplement: s1 [file s1]
